# Supplementary material
Source: PubMed Central journal article supplement (PMC3053986)
Supplement: 1017425108_pnas.1017425108_SI.pdf [file 1017425108_pnas.1017425108_SI.pdf]

# Supporting Information

Yassin et al. 10.1073/pnas.1017425108

## SI Results and Discussion

**Structural Similarity Between the IF2<sub>mt</sub> Insert and *Thermus thermophilus* IF1.** The additional residues in IF2<sub>mt</sub>, as compared to *Methanobacterium thermoautotrophicum* IF2, could perform the biochemical function of bacterial IF1 by adopting a similar structure. The factors in opposition to this possibility are the lack of sequence similarity, a different predicted secondary structure using Jpred (1) and the shorter length of the insert in comparison to the structurally characterized 72 residue *T. thermophilus* IF1 (2). Nevertheless, the insert region could still mimic smaller key structural parts of IF1 critical to performing its biochemical function. To explore this possibility, we generated vacuum trajectories of *T. thermophilus* IF1 being forced out of its ribosomal binding site in 8 different directions using Miscellaneous Mean Field Potential (MMFP) center-of-mass restraints in the CHARMM program (3). In all these trajectories, the final region of IF1 that lost contact with the ribosomal binding site was at the N-terminal end, specifically a 4-residue stretch (Lys-Glu-Lys-Asp). Although this observation could be due to topology rather than to the importance of this sequence for the interaction of IF1 with the ribosome, a similar sequence (Lys-Asp-Arg-Glu) is present in the 49 residue sequence, which allowed us to postulate a possible gapped sequence alignment of the bovine mitochondrial insert with *T. thermophilus* IF1 (Fig. S5A). Using this gapped sequence alignment, we constructed a homology model for the

49-residue sequence that mimics the structure of the first 50 residues of *T. thermophilus* IF1 [Protein Data Bank (PDB) ID 1HR0, chain W] using MODELLER (4). The N- and C-terminal ends of this shortened IF1-like structure were quite far from one another (17 Å), which is inconsistent with the proximity of the residues on the N- and C-terminal ends of the insert in the composite IF2<sub>mt</sub> model. When this 49-residue homology model was rigidly fit into the same orientation with respect to the ribosome as IF1 (Fig. S5B), its N-terminal region was outside the observed cryo-EM map, with its N- and C-terminal ends substantially separated from their connections to the rest of the flexibly fit IF2 model (Fig. S5C). This necessitated refolding of larger sections of IF2 by assigning more residues to the linker regions to get a continuous model. Even if the IF1-like orientation of this insert model was not preserved, flexible fitting into its binding site density using the SCX functionality in the Yup program (5) yielded a model with a dearth of secondary structure elements (Fig. S5D). This model was therefore considered less likely than the reported model with a compact  $\alpha$ -helical rich insert. These observed geometric restrictions imposed by the necessity to have a continuous structure that fits into the experimentally observed cryo-EM map suggest that the IF2<sub>mt</sub> insert adopts a different internal structure and/or interacts with the ribosome in a slightly different orientation than that observed for *T. thermophilus* IF1.

1. Cuff JA, Barton GJ (1999) Evaluation and improvement of multiple sequence methods for protein secondary structure prediction. *Proteins* 34:508–519.
2. Carter AP, et al. (2001) Crystal structure of an initiation factor bound to the 30S ribosomal subunit. *Science* 291:498–501.
3. Brooks BR, et al. (2009) CHARMM: The biomolecular simulation program. *J Comput Chem* 30:1545–1614.

4. Sali A, Blundell TL (1993) Comparative protein modelling by satisfaction of spatial restraints. *J Mol Biol* 234:779–815.
5. Tan RKZ, Petrov AS, Harvey SC (2006) YUP: A molecular simulation program for coarse-grained and multiscaled models. *J Chem Theory Comput* 2:529–540.





**Table S1. Comparison of interactions of IF1 (2) and the 37-aa insertion domain of IF2<sub>mt</sub> with the 16S rRNA helices h18 and h44, and protein S12**

|         |         |      |              |
|---------|---------|------|--------------|
| IF1:    | Glu3    | S12  | <u>Thr42</u> |
|         | Asp61   |      | Val40        |
| IF1:    | Tyr60   | h18: | <u>G530</u>  |
|         | Lys2    |      |              |
|         | Lys39   |      |              |
|         | Arg66   |      |              |
|         | Gly38   |      | <u>C519</u>  |
|         | Tyr35   |      |              |
|         | Met42   |      | <u>G530</u>  |
| IF1:    | Arg41   | h44: | <u>A1492</u> |
|         | Arg46   |      | <u>A1493</u> |
|         | Asn19   |      | G1491        |
|         |         |      | <u>A1492</u> |
|         |         |      | G1494        |
|         |         |      | <u>A1493</u> |
| Insert: | Ala20   | S12: | Leu52        |
|         | Lys508  |      | <u>Thr42</u> |
|         | Leu509* |      | Val43        |
|         |         |      | Thr44        |
|         |         |      | Arg41        |
| Insert: | Arg511* | h18: | C518         |
|         | Lys497  |      | <u>G530</u>  |
|         |         |      | G517         |
|         | Gln500  |      | <u>G530</u>  |
|         |         |      | U531         |
|         | Gln501  |      | <u>C519</u>  |
|         | Lys504  |      | G517         |
|         |         |      | C518         |
|         |         |      | <u>C519</u>  |
|         | Pro505  |      | <u>C519</u>  |
| Insert: | Lys506  | h44: | <u>C519</u>  |
|         | Lys476  |      | C1411        |
|         | Lys480  |      | <u>A1492</u> |
|         | Gly482  |      | <u>A1492</u> |
|         | Thr483  |      | <u>A1493</u> |
|         | Val484  |      | <u>A1492</u> |
|         |         |      | <u>A1493</u> |
|         | Lys487  |      | <u>A1492</u> |
|         | Arg489  |      | C1397        |
|         | Glu507  |      | <u>A1492</u> |

Amino-acid and nucleotide residues of the ribosomal components involved in interaction with both factors are underlined.

\*Residues directly following the insert.

**Table S2. Comparison of different composite homology models with respect to their similarity with the IF2<sub>mt</sub> sequence and the corresponding cryo-EM density**

| Model number | Template IF2 (PDB ID)                                     | % identity (% similarity) | Alignment score | Cross correlation coefficient (ccc), after flexible fits using |          |
|--------------|-----------------------------------------------------------|---------------------------|-----------------|----------------------------------------------------------------|----------|
|              |                                                           |                           |                 | Yup (1)                                                        | MDFF (2) |
| 1            | <i>M. thermoautotrophicum</i> (1G7T)                      | 23.4 (37.5)               | 433             | 0.70                                                           | —        |
| 2            | Domains IV-VIC1 from <i>M. thermoautotrophicum</i> (1G7T) | 28.2 (43.9)               | 581             | 0.67                                                           | —        |
|              | Domain VIC2 from <i>B. stearothermophilus</i> (1D1N)      |                           |                 |                                                                |          |
| 3            | Domains IV-V from <i>M. thermoautotrophicum</i> (1G7T)    | 28.9 (45.2)               | 641.5           | 0.72                                                           | 0.85     |
|              | Domain VIC1 from <i>B. stearothermophilus</i> (1Z9B)      |                           |                 |                                                                |          |
|              | Domain VIC2 from <i>B. stearothermophilus</i> (1D1N)      |                           |                 |                                                                |          |

1 Tan RKZ, Petrov AS, Harvey SC (2006) YUP: A molecular simulation program for coarse-grained and multiscaled models. *J Chem Theory Comput* 2:529–540.

2 Trabuco LG, Villa E, Schreiner E, Harrison CB, Schulten K (2009) Molecular dynamics flexible fitting: A practical guide to combine cryoelectron microscopy and X-ray crystallography. *Methods* 49:174–180.
